# Supplementary material for: ATP-binding cassette transporters restrict drug delivery and efficacy against brain tumors even when blood-brain barrier integrity is lost
Source: PubMed Central journal article supplement — Cell Rep Med. 2021 Jan 19;2(1):100184. doi: 10.1016/j.xcrm.2020.100184 (PMC7817868; doi:10.1016/j.xcrm.2020.100184), 2021-01-19
Supplement: mmc1.pdf [file mmc1.pdf]

**Cell Reports Medicine, Volume 2**

**Supplemental Information**

**ATP-binding cassette transporters restrict  
drug delivery and efficacy against brain tumors  
even when blood-brain barrier integrity is lost**

**Mark C. de Gooijer, E. Marleen Kemper, Levi C.M. Buil, Ceren H. Çitirikkaya, Tessa Buckle, Jos H. Beijnen, and Olaf van Tellingen**

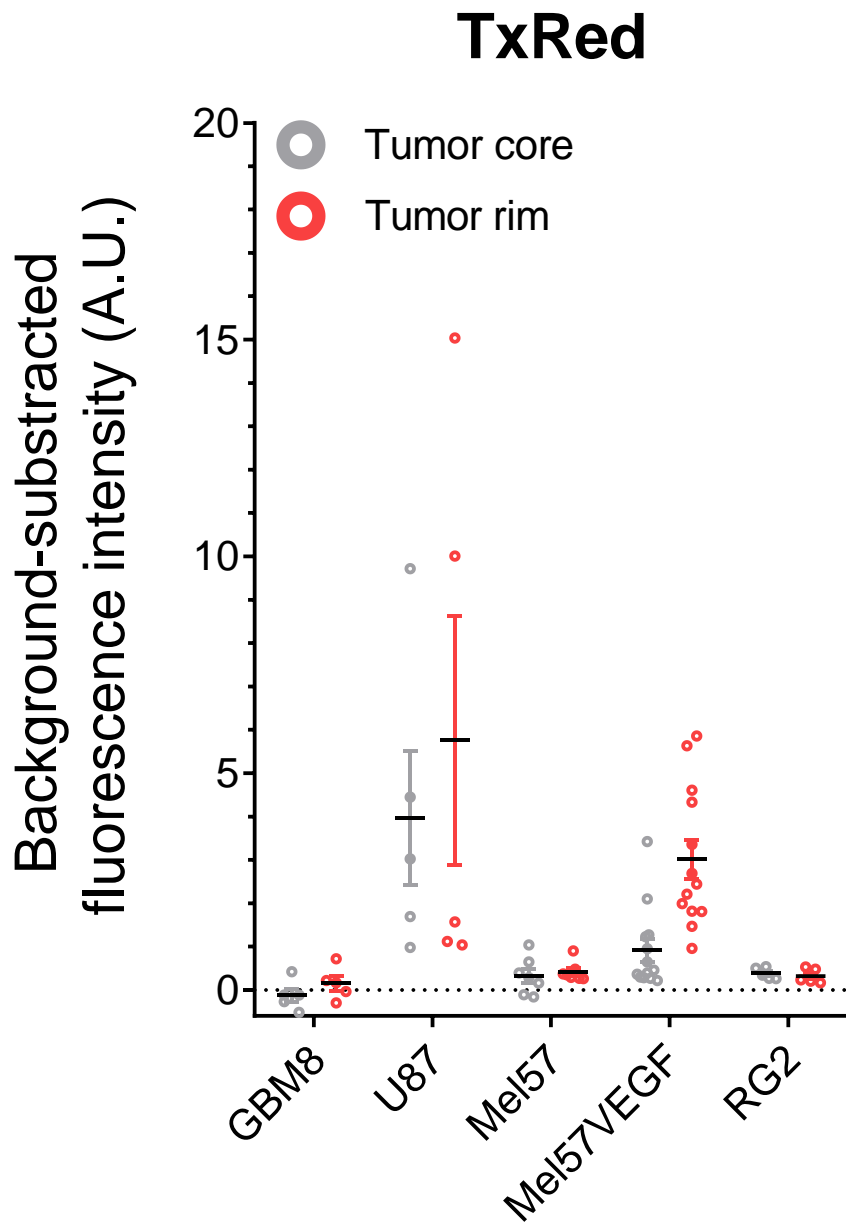

**Figure S1, related to Figure 1. Quantification of TexasRed extravasation in intracranial tumor models.** The TexasRed (TxRed) fluorescence intensity (arbitrary units, A.U.) in tumor core and tumor rim (100  $\mu\text{m}$  from tumor edge) of different intracranial tumor mouse models was quantified and corrected for autofluorescence in contralateral healthy brain regions (background). GBM8 displayed no TexasRed leakiness, while a marginal level of fluorescence was observed in RG2 and Mel57 tumors. U87 and Mel57VEGF tumors displayed a profound leakiness with ring enhancement, as apparent by the higher intensity in tumor rim versus tumor core.  $n = 5-13$ .

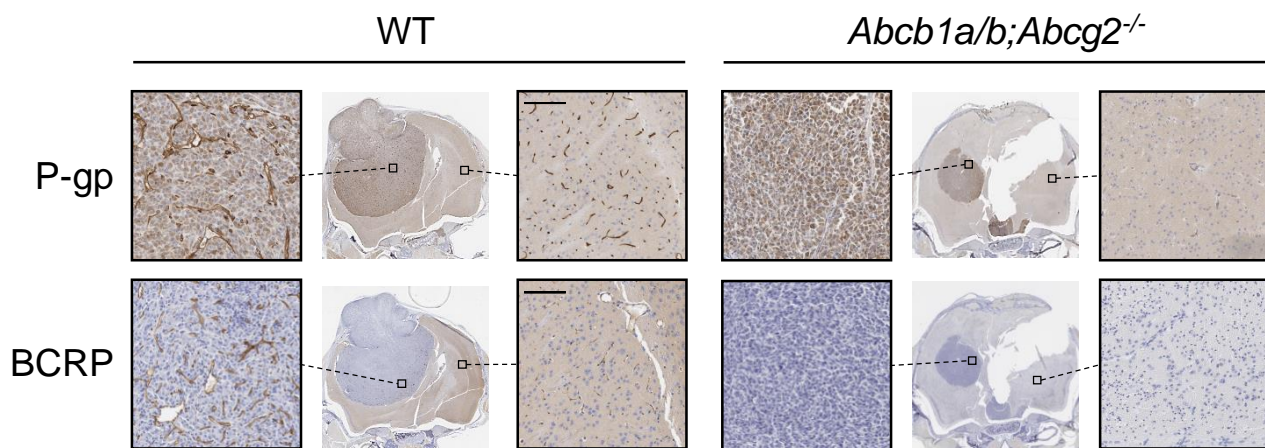

**Figure S2, related to Figure 1. Validation of ABC transporter immunohistochemistry staining.** Immunohistochemical staining of P-glycoprotein (P-gp) and breast cancer resistance protein (BCRP) in U87 tumor regions and healthy brain tissue of wild-type (WT) and *Abcb1a/b;Abcg2*<sup>-/-</sup> mice. Scale bar, 100 μm.

## RG2

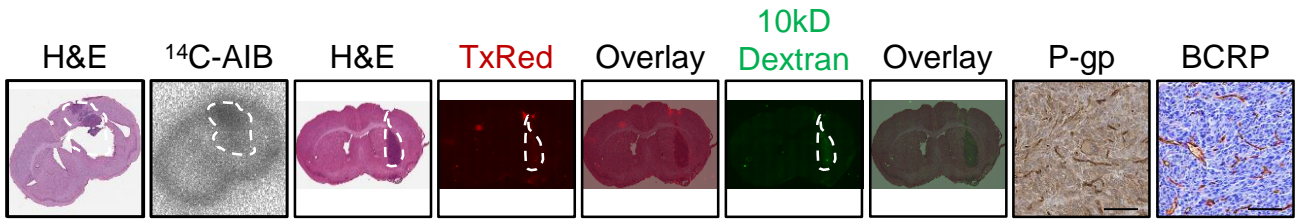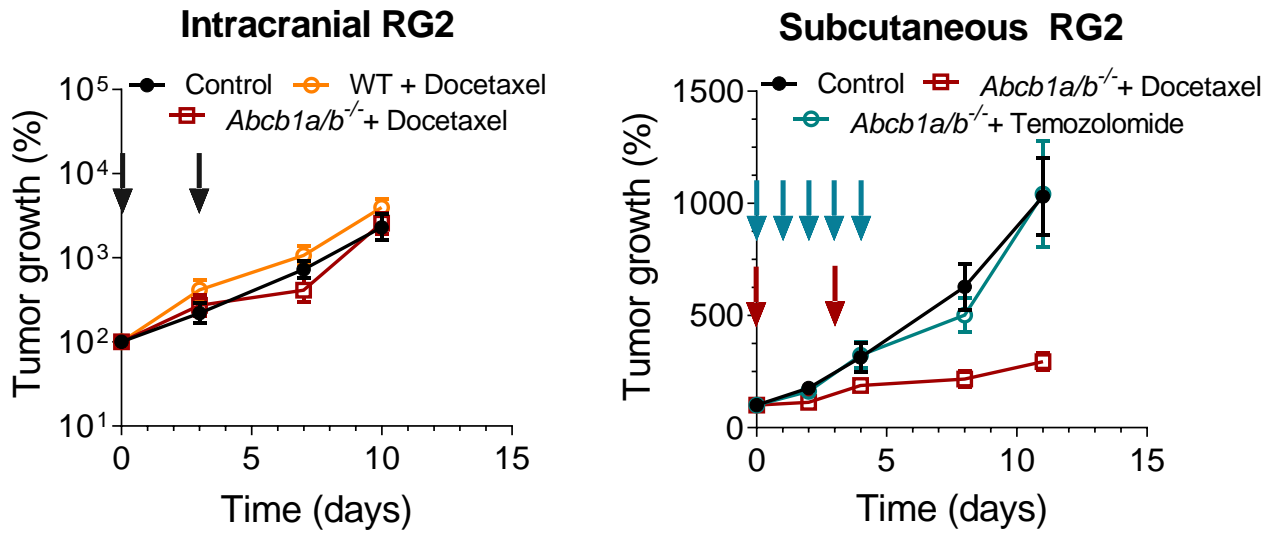

**Figure S3, related to Figure 4. Studies using the RG2 model.** The rat-derived glioma model RG2 shows evidence for mild to moderate leakiness by using fluorescent dyes (Texas Red; TxRed), 10KD-Dextran-Fluorescein and <sup>14</sup>C-aminoisobutyrate (AIB). RG2 tumors vessels stained positive for P-gp and BCRP. Intracranial RG2 did not respond to docetaxel (30 mg/kg *q3dx2*), even in *Abcb1a/b*<sup>-/-</sup> KO mice, but subcutaneous tumors did respond. Note that these subcutaneous lesions did not respond to temozolomide given 100 mg/kg *qdx5*. Scale bar, 100 μm.

| Marker            | U87      |          | GBM8     |          | Mel-57   |          | Mel-57-VEGF |          |
|-------------------|----------|----------|----------|----------|----------|----------|-------------|----------|
|                   | Allele 1 | Allele 2 | Allele 1 | Allele 2 | Allele 1 | Allele 2 | Allele 1    | Allele 2 |
| <b>Amelogenin</b> | X        |          | X        |          | X        |          | X           |          |
| <b>CSF1PO</b>     | 10       | 11       | 11       | 13       | 11       |          | 11          |          |
| <b>D21S11</b>     | 28       | 32.2     | 29       | 30       | 28       |          | 28          |          |
| <b>D5S818</b>     | 11       | 12       | 12       | 13       | 12       |          | 12          |          |
| <b>D7S820</b>     | 8        | 9        | 8        | 10       | 10       | 13       | 10          | 13       |
| <b>D13S317</b>    | 8        | 11       | 12       |          | 11       | 13       | 11          | 13       |
| <b>D16S539</b>    | 12       |          | 11       | 12       | 11       |          | 11          |          |
| <b>TH01</b>       | 9.3      |          | 9.3      |          | 9        |          | 9           |          |
| <b>TPOX</b>       | 8        |          | 8        |          | 12       |          | 12          |          |
| <b>vWA</b>        | 15       | 17       | 18       | 19       | 14       | 17       | 14          | 17       |

**Table S1, related to Experimental Procedures.** Overview of STR markers as analyzed by the GenePrint 10 System.
